# Supplementary material for: A functional requirement for sex-determination M/m locus region lncRNA genes in Aedes aegypti female larvae
Source: PubMed Central journal article supplement (PMC8137943; doi:10.1038/s41598-021-90194-7), 2021-05-20
Supplement: 41598_2021_90194_MOESM1_ESM.pdf [file 41598_2021_90194_MOESM1_ESM.pdf]

# **A functional requirement for sex-determination M/m locus region**

## ***lncRNA* genes in *Aedes aegypti* female larvae**

### ***Supplementary Files:***

Keshava Mysore<sup>1,2</sup>, Limb K. Hapairai<sup>1,2</sup>, Ping Li<sup>1,2</sup>, Joseph B. Roethele<sup>1,2</sup>, Longhua Sun<sup>1,2</sup>, Jessica Igiede<sup>1,2</sup>, Joi K. Misenti<sup>1,2</sup>, and Molly Duman-Scheel<sup>1,2\*</sup>

<sup>1</sup>Indiana University School of Medicine, Department of Medical and Molecular Genetics, South Bend, IN, USA.

<sup>2</sup>University of Notre Dame Eck Institute for Global Health, Notre Dame, IN, USA.

\*Contact PI:

Molly Duman-Scheel

[mscheel@nd.edu](mailto:mscheel@nd.edu)

Raclin-Carmichael Hall

1234 Notre Dame Ave.

South Bend, IN 46617

(574) 631-7194

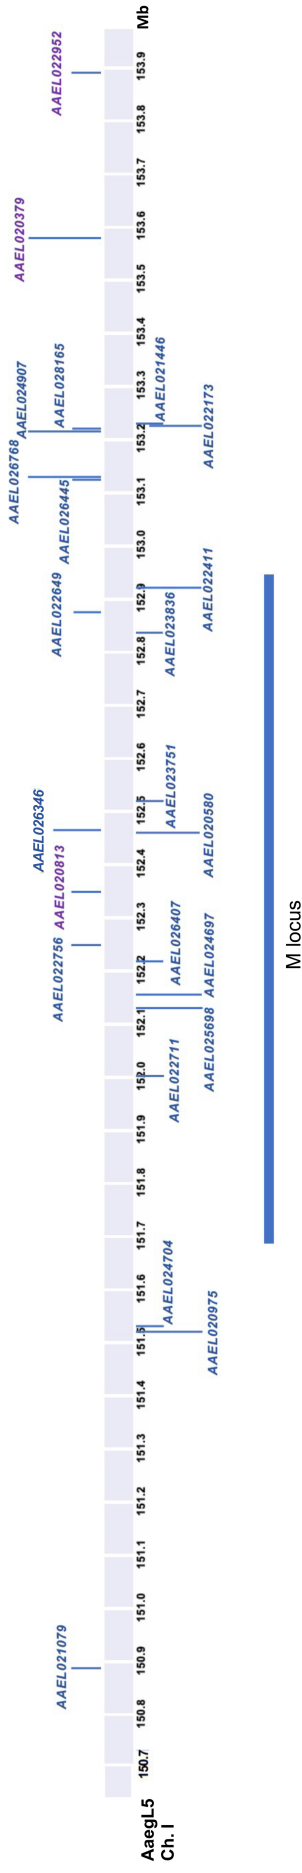

**Supplementary Fig. S1.** Chromosomal locations of M/m locus region genes containing target sites corresponding to the siRNAs identified in the female-specific lethal screen. Genes shown above the chromosomal schematic are on the forward strand, while those noted below it are on the reverse strand. The genes targeted by larvicide #478 are highlighted in purple. *AAEL027827* (Chromosome 1: 154,564,311-154,565,137 forward strand) and *AAEL027761* (Chromosome 1: 172,956,231-172,956,668 Mb, forward strand) also contain target sites, but are not pictured here. The predicted boundaries of the M (dark blue) locus<sup>7</sup> are indicated.

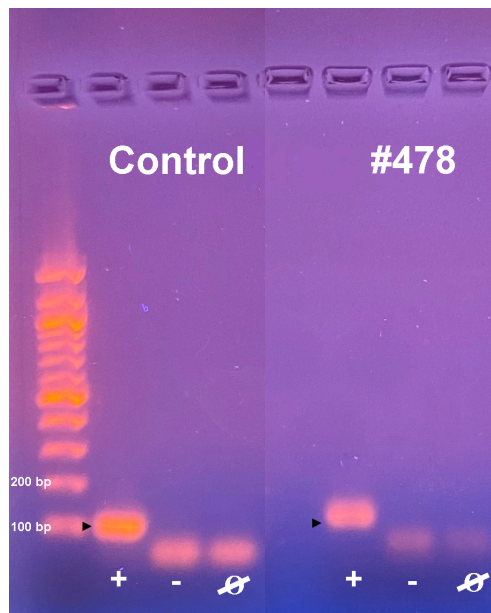

**Supplementary Fig. S2. Confirmation of shRNA expression in recombinant yeast.** cDNA was prepared from total RNA which was extracted from the control or #478 recombinant yeast strains. The cDNA subsequently served as template in PCR reactions in which forward primers corresponding the 3' end of the control (left) or #478 (right) shRNA hairpins and a reverse primer corresponding to the terminator amplified a fragment of ~100 bp (see DNA standard ladder at far left). Amplicons were visualized on an agarose gel stained with ethidium bromide. Negative controls included amplifications with cDNA prepared from yeast strains that had not been transformed with shRNA expression plasmids (marked by – sign), as well as a PCR reactions in which no cDNA had been added (marked by knot symbol; unused primers are visible in both of these negative controls). One of two biological replicate experiments that yielded similar results is shown here.

## Survival Curve - #478 - Treated Larvae

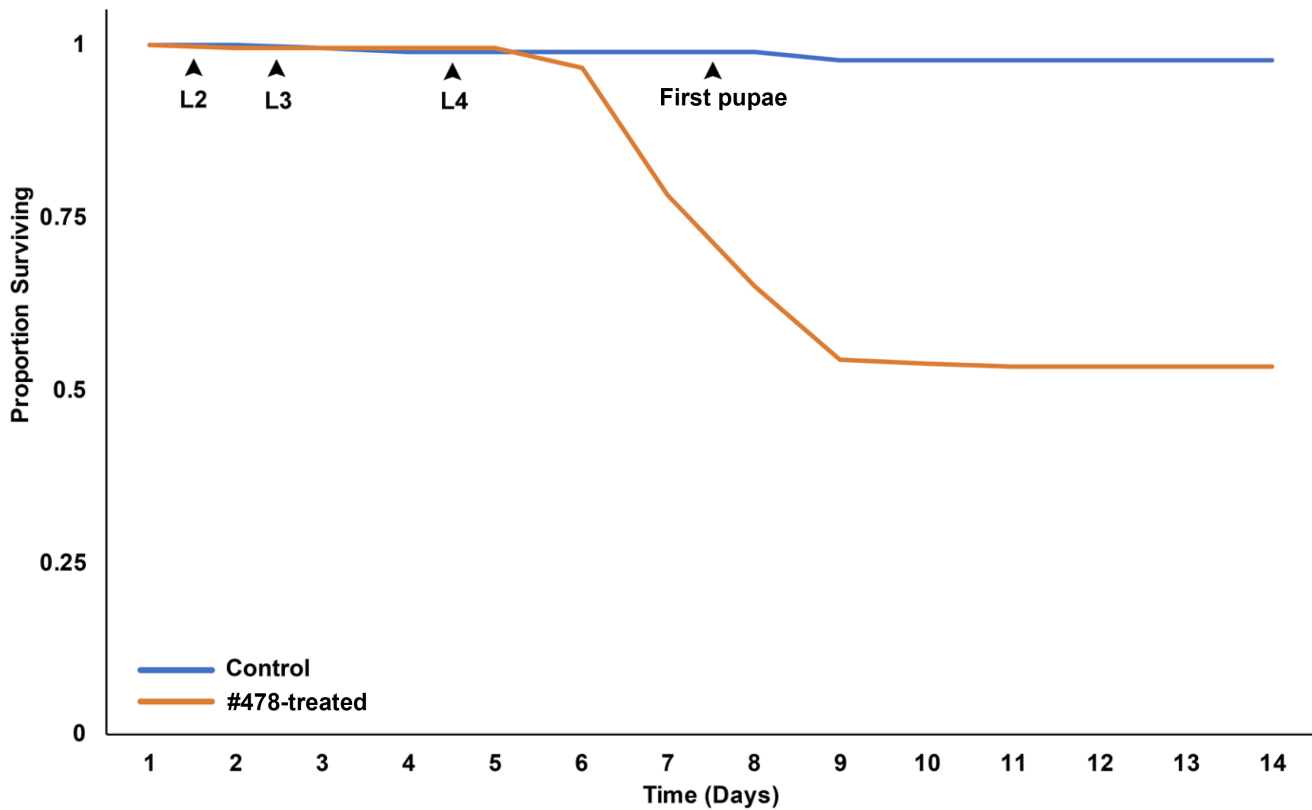

### Supplementary Fig. S3. Larval survival following treatment with yeast interfering RNA larvicide #478.

A survival curve for larvae that fed on yeast larvicide #478 is shown. Although larvae that were treated with control interfering RNA yeast survived, nearly half of larvae treated with yeast larvicide #478 died prior to pupation. Data were compiled from nine replicate container trials per control or #478 treatment (n = 180 larvae total per treatment). L1 = first instar, L2 = second instar, L3 = third instar, L4 = fourth instar.

| siRNA # | Target Sequence            | Corresponding M/m Locus Region <i>lncRNA</i> Genes |
|---------|----------------------------|----------------------------------------------------|
| 470     | GGUUUACUAAAAUCACUUUCCUUG   | AAEL026346                                         |
| 487     | GUCACUAAGCUCUAUAAUCAAAUA   | AAEL022649                                         |
| 511     | GUUUUUUUAUGUUUGCAUCAACAGUU | AAEL023836                                         |
| 525     | UGGCAAUUAUCCAAGAACAUCUAC   | AAEL028165                                         |
| 526     | AAUUUAUCCAAGAACAUCUACAUCU  | AAEL028165                                         |
| 540     | AAAGUGCAUCAUGUGAUAAAUCGA   | AAEL021079                                         |
| 542     | AUUAUGAACAACAUGUUUAAAUA    | AAEL027827                                         |
| 553     | GGCUAUGCAAACCAAUUCAAAUCA   | AAEL022711                                         |

**Supplementary Table S1. Female-specific siRNA larvicides that target single M/m locus region *lncRNA* genes.** A number of siRNAs identified in the screen have perfectly conserved 25 bp target sites that are found in singular *lncRNA* genes at or tightly linked to the M/m locus.

| siRNA # | Target Sequence           | Corresponding M/m Locus Region <i>lncRNA</i> Genes         | Corresponding <i>lncRNA</i> Genes outside M/m Locus Region |
|---------|---------------------------|------------------------------------------------------------|------------------------------------------------------------|
| 474     | AGAAUCUUCUJACAAUCACUGCCUC | AAEL020580                                                 | AAEL024146                                                 |
| 478     | GACUAAUGUCUGGAAUJAGUAUAAA | AAEL020379, AAEL020813, AAEL022952                         |                                                            |
| 504     | CAUCCAACCUUCAAGCGAAUCAGTG | AAEL026407                                                 | AAEL021597, AAEL022807, AAEL026655                         |
| 505     | AUUGAGACUUACCAACUGAUCAGUU | AAEL024697                                                 | AAEL021470, AAEL027259                                     |
| 506     | CAAGUGAAAUAACAUCAAGAUUU   | AAEL022756                                                 | AAEL024428, AAEL022640                                     |
| 509     | GAUAAAGCAUUCAUUCCGCUACUUA | AAEL025698                                                 | AAEL021884                                                 |
| 514     | AGCAGAAAGAUUGAAAUUAAUACCA | AAEL022411, AAEL027761                                     | AAEL023838                                                 |
| 516     | AGCGUUGAAAAUCUAUAAAAACCU  | AAEL026768, AAEL026445                                     |                                                            |
| 517     | AGCGAUGGAAGAUUGUAAAAUCGA  | AAEL026768, AAEL026445                                     |                                                            |
| 518     | AGUCAGGGUUUAAUUCAUUGUUCGA | AAEL021446, AAEL022173, AAEL023751, AAEL024907, AAEL028165 | AAEL022531, AAEL027422                                     |
| 559     | AACCAGAAUCGGUAACCUAAAUUGU | AAEL024704, AAEL020975                                     |                                                            |

**Supplementary Table S2. Female-specific siRNA larvicides that target multiple *A. aegypti lncRNA***

**genes.** A number of siRNAs identified in the screen have perfectly conserved 25 bp target sites that are found in transcripts which correspond to multiple *lncRNA* genes, at least one of which resides in the M/m locus region.

| Chromosomal Location                                 | <i>lncRNA</i> Gene | Type                    |
|------------------------------------------------------|--------------------|-------------------------|
| Chromosome 1: 150,998,186-150,999,313 forward strand | AAEL021079         | Intragenic (AAEL017331) |
| Chromosome 1: 151,645,556-151,646,218 reverse strand | AAEL020975         | Intragenic (AAEL017331) |
| Chromosome 1: 151,659,254-151,659,981 reverse strand | AAEL024704         | Intragenic (AAEL017331) |
| Chromosome 1: 152,107,761-152,108,630 reverse strand | AAEL022711         | Intragenic (AAEL021838) |
| Chromosome 1: 152,238,688-152,239,180 reverse strand | AAEL025698         | Intragenic (AAEL021838) |
| Chromosome 1: 152,265,957-152,266,593 reverse strand | AAEL024697         | Intergenic              |
| Chromosome 1: 152,315,810-152,316,472 reverse strand | AAEL026407         | Intergenic              |
| Chromosome 1: 152,350,018-152,350,537 forward strand | AAEL022756         | Intergenic              |
| Chromosome 1: 152,441,886-152,442,268 forward strand | AAEL020813         | Intergenic              |
| Chromosome 1: 152,552,655-152,554,770 reverse strand | AAEL020580         | Intergenic              |
| Chromosome 1: 152,555,446-152,556,373 forward strand | AAEL026346         | Intergenic              |
| Chromosome 1: 152,609,464-152,609,987 reverse strand | AAEL023751         | Intergenic              |
| Chromosome 1: 152,908,968-152,909,549 reverse strand | AAEL023836         | Intergenic              |
| Chromosome 1: 152,962,655-152,995,751 forward strand | AAEL022649         | Intergenic              |
| Chromosome 1: 152,998,785-152,999,264 reverse strand | AAEL022411         | Intergenic              |
| Chromosome 1: 153,191,089-153,192,260 forward strand | AAEL026445         | Intragenic (AAEL014760) |
| Chromosome 1: 153,195,585-153,196,259 forward strand | AAEL026768         | Intragenic (AAEL014760) |
| Chromosome 1: 153,276,374-153,276,935 forward strand | AAEL024907         | Intergenic              |
| Chromosome 1: 153,284,611-153,285,229 forward strand | AAEL028165         | Intergenic              |
| Chromosome 1: 153,287,383-153,289,863 reverse strand | AAEL022173         | Intergenic              |
| Chromosome 1: 153,296,153-153,298,858 reverse strand | AAEL021446         | Intergenic              |
| Chromosome 1: 153,621,362-153,621,744 forward strand | AAEL020379         | Intergenic              |
| Chromosome 1: 153,923,572-153,923,954 forward strand | AAEL022952         | Intergenic              |
| Chromosome 1: 154,564,311-154,565,137 forward strand | AAEL027827         | Intragenic (AAEL008071) |
| Chromosome 1: 172,956,231-172,956,668 forward strand | AAEL027761         | Intergenic              |

**Supplementary Table S3. Chromosomal locations of M/m locus region *A. aegypti* lncRNA genes**

**identified in the screen.** siRNAs that induced significant death in females correspond identically to 25 bp target sites in 24 M/m locus *lncRNA* genes, the identification numbers and chromosomal locations of which are shown. For intragenic *lncRNA* genes, the genes in which the lncRNA coding sequences are contained are noted.

| siRNA # | Target sequence            | M/m Locus Region <i>lncRNA</i> Genes |
|---------|----------------------------|--------------------------------------|
| 471     | GGUUUACUAAAAUCACUUUUCUTG   | AAEL026346, AAEL022070               |
| 473     | CACUUUUCUUGUAAUCCUCAACCAA  | AAEL022070                           |
| 475     | GUGCUAUACUUGGAACUUGGCGATT  | AAEL022114, AAEL020130, AAEL024877   |
| 476     | AGAUUUCUCAGUCAACCGAAAU CGA | AAEL022114, AAEL020130, AAEL024877   |
| 477     | CGAGGACUAAUGUCUGGAAUUAGTA  | AAEL020813, AAEL020379, AAEL022952   |
| 479     | GGAUACCGGUGGACAUUCUAUCUGG  | AAEL024877, AAEL020130, AAEL022114   |
| 480     | UGAAAGGAAUUUACGGAAGAACATT  | AAEL022112, AAEL020185               |
| 481     | GAACCAUUGUCAACAUCGAUAGUGC  | AAEL028699                           |
| 482     | AACCAGUACUGAAUUGUCAGAAAGA  | AAEL022894, AAEL025485               |
| 484     | ACCAACUUUAUACAAAGAAAAGGTC  | AAEL022321, AAEL025316               |
| 485     | GUGGUGGUAAUUAUAGACGAAUCAA  | AAEL025316                           |
| 488     | AGAUGAACCAUACGCUAGAACAAG   | AAEL022649, AAEL014822               |
| 489     | GUAGUAUCAAUUGAAUUAUUAUUGCT | AAEL017331                           |
| 492     | GAUGAUUUCGAACAGAAUUUUCUGA  | AAEL014760                           |
| 499     | GAUGUUGAUGUACAGGUUAUUUCTA  | AAEL011832                           |
| 500     | GGACCAACUUUUACUUCAGAUAGA   | AAEL011832                           |
| 503     | GGAUCAUUCUCCCAUGCCAUCAA    | AAEL026407                           |
| 507     | CUUAGUGGAAUUGAAUUGUAGAUAC  | AAEL025579, AAEL027372               |
| 508     | AUUGUAGAUACCUUGGAUGAAUAAA  | AAEL025579, AAEL027372               |
| 510     | AAGAAUACAAAUCAUCUGCUACCAA  | AAEL021974                           |
| 512     | GUAUGAGACAUGACUAAAAAUGTT   | AAEL022650                           |
| 513     | GAAGAAACUCUAUUGAUCACAUGAA  | AAEL021077                           |
| 515     | GCAGCAUGAUUUCAAUACUUCTACTA | AAEL026785                           |
| 520     | GAUAAAUGUUACUAAAGCUAUUCAA  | AAEL023283                           |
| 524     | GGCAAUUUAUCCAAGAACAUCUACA  | AAEL028165                           |
| 527     | AAACGAGAAUUUGUGGAAUAGUTG   | AAEL026346                           |
| 528     | AAACGAGAAUUUGUGGAAUAGUTG   | AAEL026346                           |
| 541     | AGCAUUUGGACAAAUCAAUACAGTA  | AAEL021079                           |
| 543     | CAUGUUUAAAUAAAUAAAAAAGCAT  | AAEL027827                           |
| 544     | GAGACUGCAAAGAACGUUACUATA   | AAEL028113                           |
| 552     | GAGAGAUCCAGUCCAGUUUAAUCGA  | AAEL025669                           |

**Supplementary Table S4. siRNAs that had no significant impact on male:female ratios.** A number of siRNAs corresponding to M/m locus region *lncRNA* genes were evaluated in the screen and found to have no significant impact on male or female *A. aegypti* larval survival.
